# Supplementary material for: Serum sex hormone-binding globulin is a mediator of the association between intrahepatic lipid content and type 2 diabetes: the Maastricht Study
Source: PubMed Central journal article supplement (PMC9729158; doi:10.1007/s00125-022-05790-7), 2022-09-17
Supplement: 125_2022_5790_MOESM1_ESM.pdf [file 125_2022_5790_MOESM1_ESM.pdf]

**Serum sex hormone-binding globulin is a mediator of the association between  
intrahepatic lipid content and type 2 diabetes: The Maastricht Study**

**Electronic Supplementary Materials**

**ESM Table 1.** Characteristics of the study population stratified according to sex

|                                                    | Men                  |                                                        |                                                  | Women                |                                                        |                                                  |
|----------------------------------------------------|----------------------|--------------------------------------------------------|--------------------------------------------------|----------------------|--------------------------------------------------------|--------------------------------------------------|
|                                                    | Overall<br>(n = 810) | Individuals<br>without type 2<br>diabetes<br>(n = 548) | Individuals with<br>type 2 diabetes<br>(n = 262) | Overall<br>(n = 744) | Individuals<br>without type 2<br>diabetes<br>(n = 637) | Individuals with<br>type 2 diabetes<br>(n = 107) |
| Age, years                                         | 61 ± 8               | 60 ± 8                                                 | 63 ± 8                                           | 58 ± 8               | 58 ± 8                                                 | 61 ± 8                                           |
| Postmenopausal, % of women                         |                      |                                                        |                                                  | 79.2                 | 78.3                                                   | 84.1                                             |
| Use of oestrogen-containing medication, % of women |                      |                                                        |                                                  | 4.0                  | 3.8                                                    | 5.6                                              |
| Education level<br>low/medium/high, %              | 25.8 / 29.6 / 44.6   | 21.2 / 29.4 / 49.5                                     | 35.5 / 30.2 / 34.4                               | 35.2 / 28.0 / 36.8   | 32.7 / 27.6 / 39.7                                     | 50.5 / 29.9 / 19.6                               |
| Smoking, never/former/current, %                   | 36.7 / 52.0 / 11.2   | 38.1 / 50.7 / 11.1                                     | 33.7 / 54.8 / 11.5                               | 39.4 / 48.1 / 12.5   | 39.7 / 48.0 / 12.2                                     | 42.8 / 48.6 / 14.0                               |
| Dutch healthy diet index (DHD-13)*                 | 73.9 ± 13.9          | 74.3 ± 14.0                                            | 74.1 ± 13.6                                      | 80.9 ± 13.0          | 81.2 ± 13.0                                            | 78.9 ± 12.9                                      |
| Alcohol, g/day                                     | 12.0 (3.9-23.5)      | 14.3 (5.6-24.7)                                        | 7.6 (1.5-20.7)                                   | 6.0 (0.8-14.2)       | 7.1 (1.3-14.7)                                         | 5.2 (0.1-8.8)                                    |
| Physical activity, min/day                         | 119.4 (88.3-149.4)   | 126.8 (97.1-154.9)                                     | 99.0 (72.0-135.3)                                | 122.7 (100.3-148.3)  | 127.8 (103.4-150.1)                                    | 105.0 (80.8-137.0)                               |
| BMI, kg/m <sup>2</sup>                             | 27.2 ± 3.7           | 26.3 ± 3.1                                             | 28.7 ± 4.1                                       | 25.9 ± 4.4           | 25.3 ± 4.1                                             | 28.9 ± 4.9                                       |
| Waist circumference, cm                            | 99.8 ± 11.0          | 96.8 ± 9.3                                             | 106.1 ± 11.5                                     | 88.3 ± 11.4          | 86.7 ± 10.2                                            | 98.2 ± 13.0                                      |
| Office systolic blood pressure, mmHg               | 139 ± 16             | 137 ± 17                                               | 142 ± 16                                         | 128 ± 16             | 127 ± 16                                               | 135 ± 17                                         |
| Office diastolic blood pressure, mmHg              | 79 ± 10              | 79 ± 10                                                | 78 ± 10                                          | 73 ± 9               | 73 ± 9                                                 | 74 ± 8                                           |
| Total cholesterol, mmol/L                          | 5.0 ± 1.1            | 5.4 ± 1.0                                              | 4.3 ± 1.0                                        | 5.6 ± 1.1            | 5.8 ± 1.1                                              | 4.7 ± 1.1                                        |
| HDL cholesterol, mmol/L                            | 1.4 ± 0.4            | 1.5 ± 0.4                                              | 1.2 ± 0.3                                        | 1.8 ± 0.5            | 1.8 ± 0.5                                              | 1.5 ± 0.4                                        |

|                                       |                  |                  |                   |                  |                  |                   |
|---------------------------------------|------------------|------------------|-------------------|------------------|------------------|-------------------|
| LDL cholesterol, mmol/L               | 3.0 ± 1.0        | 3.3 ± 0.9        | 2.3 ± 0.9         | 3.2 ± 1.0        | 3.4 ± 1.0        | 2.5 ± 0.9         |
| Triglycerides, mmol/L                 | 1.3 (0.9-1.8)    | 1.2 (0.9-1.6)    | 2.2 (1.7-2.8)     | 1.1 (0.8-1.6)    | 1.1 (0.8-1.5)    | 1.5 (1.1-2.2)     |
| Use of lipid-modifying medication, %  | 40.6             | 24.3             | 74.8              | 23.3             | 15.7             | 68.2              |
| HbA1c, %                              | 5.6 (5.4-6.3)    | 5.4 (5.3-5.7)    | 6.7 (6.3-7.3)     | 5.5 (5.3-5.8)    | 5.4 (5.3-5.7)    | 6.6 (6.0-7.4)     |
| HbA1c, mmol/mol                       | 38 (35-45)       | 36 (34-39)       | 50 (45-56)        | 37 (34-40)       | 36 (34-39)       | 49 (42-57)        |
| Fasting glucose, mmol/L               | 5.8 (5.2-6.9)    | 5.4 (5.1-5.9)    | 7.7 (6.9-8.9)     | 5.2 (4.9-5.7)    | 5.1 (4.9-5.5)    | 7.3 (6.5-8.0)     |
| Fasting insulin, pmol/L               | 64.3 (45.1-98.3) | 60.8 (44.1-86.8) | 83.3 (47.4-129.0) | 53.3 (38.3-75.9) | 51.0 (37.2-69.8) | 82.8 (54.4-118.1) |
| Matsuda index                         | 3.1 (1.9-4.7)    | 3.5 (2.3-5.1)    | 2.0 (1.2-3.0)     | 4.3 (2.6-6.0)    | 4.5 (3.1-6.2)    | 2.0 (1.4-2.7)     |
| Use of glucose-lowering medication, % | 24.8             | 0.0              | 76.7              | 10.3             | 0                | 72.0              |
| Intrahepatic lipid content, %         | 4.0 (2.5-7.5)    | 3.5 (2.3-6.0)    | 6.5 (3.6-10.9)    | 2.7 (1.7-5.2)    | 2.5 (1.6-4.5)    | 5.5 (3.3-10.2)    |
| Serum SHBG, nmol/L                    | 29.6 (22.4-39.7) | 31.8 (24.1-41.8) | 25.4 (19.1-32.5)  | 45.0 (31.8-64.9) | 47.3 (35.0-66.0) | 31.9 (21.5-47.5)  |

\* Dutch Healthy Diet (DHD-14) index minus alcohol component (= DHD-13).

Data are presented as mean ± standard deviation or median (interquartile range), unless otherwise indicated.

Abbreviations: BMI: body mass index; HDL: high density lipoprotein; LDL: low density lipoprotein; HbA1c: haemoglobin A1c; SHBG: sex hormone-binding globulin

**ESM Table 2.** Mediation effect of serum SHBG on the association between intrahepatic lipid content and type 2 diabetes status after accounting for oversampling of individuals with type 2 diabetes

|                              | Men<br>(n = 810) |                      | Women<br>(n = 744) |                      |
|------------------------------|------------------|----------------------|--------------------|----------------------|
|                              | OR (95% CI)      | % mediated (95% CI)* | OR (95% CI)        | % mediated (95% CI)* |
| <b>Crude</b>                 |                  |                      |                    |                      |
| Total effect <sup>†</sup>    | 1.12 (1.08;1.16) |                      | 1.07 (1.04;1.14)   |                      |
| Direct effect <sup>†</sup>   | 1.10 (1.07;1.15) |                      | 1.04 (1.01;1.09)   |                      |
| Indirect effect <sup>†</sup> | 1.01 (1.01;1.02) | 12.3 (5.5;21.3)      | 1.03 (1.02;1.06)   | 47.8 (25.5;78.8)     |
| <b>Model 1</b>               |                  |                      |                    |                      |
| Total effect                 | 1.12 (1.08;1.16) |                      | 1.07 (1.04;1.13)   |                      |
| Direct effect                | 1.10 (1.06;1.14) |                      | 1.04 (1.01;1.09)   |                      |
| Indirect effect              | 1.02 (1.01;1.03) | 18.5 (9.7;29.0)      | 1.03 (1.02;1.06)   | 45.6 (23.0;79.0)     |
| <b>Model 2</b>               |                  |                      |                    |                      |
| Total effect                 | 1.08 (1.04;1.13) |                      | 1.04 (1.00;1.09)   |                      |
| Direct effect                | 1.07 (1.03;1.11) |                      | 1.02 (0.98;1.07)   |                      |
| Indirect effect              | 1.01 (1.00;1.02) | 12.0 (0.5;26.6)      | 1.01 (1.00;1.09)   | 39.7 (-15.3;268.5)   |
| <b>Model 3</b>               |                  |                      |                    |                      |
| Total effect                 |                  |                      | 1.04 (1.00;1.09)   |                      |
| Direct effect                |                  |                      | 1.02 (0.98;1.07)   |                      |
| Indirect effect              |                  |                      | 1.02 (1.01;1.04)   | 53.2 (-142.2;332.5)  |

\* % mediated is calculated as  $OR^{Direct} \cdot (OR^{Indirect} - 1) / (OR^{Direct} \cdot OR^{Indirect} - 1) \cdot 100$

<sup>†</sup> Total effect represents association between intrahepatic lipid (IHL) content and type 2 diabetes; direct effect represents association between IHL and type 2 diabetes status not attributable to serum SHBG; indirect effect represents association between IHL and type 2 diabetes attributable to serum SHBG (= mediation).

Model 1: adjusted for age

Model 2: additionally adjusted for BMI, alcohol intake, Dutch Healthy Diet index (DHD-13), level of education, and total physical activity

Model 3: additionally adjusted for menopausal status and use of oestrogen-containing medication

**ESM Table 3.** Mediation effect of serum SHBG on the association between hepatic steatosis (yes/no) and type 2 diabetes status

|                              | Men<br>(n = 810) |                      | Women<br>(n = 744) |                      |
|------------------------------|------------------|----------------------|--------------------|----------------------|
|                              | OR (95% CI)      | % mediated (95% CI)* | OR (95% CI)        | % mediated (95% CI)* |
| <b>Crude</b>                 |                  |                      |                    |                      |
| Total effect <sup>†</sup>    | 3.62 (2.66;4.99) |                      | 4.41 (2.86;6.83)   |                      |
| Direct effect <sup>†</sup>   | 3.22 (2.35;4.45) |                      | 2.29 (1.24;4.02)   |                      |
| Indirect effect <sup>†</sup> | 1.12 (1.03;1.23) | 15.0 (4.3;25.9)      | 1.28 (0.88;1.86)   | 28.2 (-17.6;65.8)    |
| <b>Model 1</b>               |                  |                      |                    |                      |
| Total effect                 | 3.59 (2.61;5.01) |                      | 4.21 (2.71;6.57)   |                      |
| Direct effect                | 2.98 (2.16;4.13) |                      | 2.65 (1.52;4.48)   |                      |
| Indirect effect              | 1.21 (1.08;1.36) | 23.6 (10.3;36.7)     | 1.59 (1.22;2.17)   | 48.7 (22.9;74.5)     |
| <b>Model 2</b>               |                  |                      |                    |                      |
| Total effect                 | 2.53 (1.79;3.66) |                      | 2.52 (1.52;4.23)   |                      |
| Direct effect                | 2.35 (1.66;3.99) |                      | 2.01 (1.12;3.55)   |                      |
| Indirect effect              | 1.08 (0.97;1.20) | 11.7 (-5.31;27.4)    | 1.25 (1.04;1.59)   | 33.2 (5.2;80.1)      |
| <b>Model 3</b>               |                  |                      |                    |                      |
| Total effect                 |                  |                      | 2.56 (1.54;4.37)   |                      |
| Direct effect                |                  |                      | 1.85 (1.03;3.27)   |                      |
| Indirect effect              |                  |                      | 1.38 (1.15;1.75)   | 45.5 (20.0;94.3)     |

\* % mediated is calculated as  $OR^{Direct} \cdot (OR^{Indirect} - 1) / (OR^{Direct} * OR^{Indirect} - 1) * 100$

<sup>†</sup> Total effect represents association between hepatic steatosis (yes/no) and type 2 diabetes; direct effect represents association between hepatic steatosis and type 2 diabetes status not attributable to serum SHBG; indirect effect represents association between hepatic steatosis and type 2 diabetes attributable to serum SHBG (= mediation).

Model 1: adjusted for age

Model 2: additionally adjusted for BMI, alcohol intake, Dutch Healthy Diet index (DHD-13), level of education, and total physical activity

Model 3: additionally adjusted for menopausal status and use of oestrogen-containing medication

**ESM Table 4.** Mediation effect of serum SHBG on the association between intrahepatic lipid content and type 2 diabetes status with adjustment for waist circumference in model 2.

|                              | Men<br>(n = 810) |                      | Women<br>(n = 744) |                      |
|------------------------------|------------------|----------------------|--------------------|----------------------|
|                              | OR (95% CI)      | % mediated (95% CI)* | OR (95% CI)        | % mediated (95% CI)* |
| <b>Crude</b>                 |                  |                      |                    |                      |
| Total effect <sup>†</sup>    | 1.12 (1.09;1.17) |                      | 1.08 (1.04;1.14)   |                      |
| Direct effect <sup>†</sup>   | 1.10 (1.07;1.15) |                      | 1.04 (1.01;1.09)   |                      |
| Indirect effect <sup>†</sup> | 1.02 (1.01;1.03) | 17.2 (9.6;27.6)      | 1.04 (1.02;1.07)   | 50.9 (26.7;81.3)     |
| <b>Model 1</b>               |                  |                      |                    |                      |
| Total effect                 | 1.13 (1.09;1.18) |                      | 1.08 (1.05;1.13)   |                      |
| Direct effect                | 1.10 (1.06;1.14) |                      | 1.04 (1.01;1.09)   |                      |
| Indirect effect              | 1.03 (1.02;1.04) | 24.6 (15.6;36.0)     | 1.04 (1.02;1.07)   | 48.5 (24.0;80.4)     |
| <b>Model 2</b>               |                  |                      |                    |                      |
| Total effect                 | 1.08 (1.04;1.12) |                      | 1.02 (0.98;1.07)   |                      |
| Direct effect                | 1.06 (1.03;1.11) |                      | 1.01 (0.97;1.06)   |                      |
| Indirect effect              | 1.01 (1.01;1.02) | 18.0 (7.8;35.9)      | 1.01 (1.00;1.03)   | 49.5 (-45.3;481.0)   |
| <b>Model 3</b>               |                  |                      |                    |                      |
| Total effect                 |                  |                      | 1.02 (0.98;1.07)   |                      |
| Direct effect                |                  |                      | 1.00 (0.96;1.05)   |                      |
| Indirect effect              |                  |                      | 1.02 (1.00;1.04)   | 77.2 (-616.6;721.9)  |

\* % mediated is calculated as  $OR^{Direct}(OR^{Indirect} - 1)/(OR^{Direct} * OR^{Indirect} - 1) * 100$

<sup>†</sup> Total effect represents association between intrahepatic lipid (IHL) content and type 2 diabetes; direct effect represents association between IHL and type 2 diabetes status not attributable to serum SHBG; indirect effect represents association between IHL and type 2 diabetes attributable to serum SHBG (= mediation).

Model 1: adjusted for age

Model 2: additionally adjusted for waist circumference, alcohol intake, Dutch Healthy Diet index (DHD-13), level of education, and total physical activity

Model 3: additionally adjusted for menopausal status and use of oestrogen-containing medication



**ESM Table 5.** Mediation effect of serum SHBG on the association between intrahepatic lipids and (log) HbA1c

|                              | Men<br>(n = 810)        |                      | Women<br>(n = 741)     |                      |
|------------------------------|-------------------------|----------------------|------------------------|----------------------|
|                              | Beta (95% CI)           | % mediated (95% CI)* | Beta (95% CI)          | % mediated (95% CI)* |
| <b>Crude</b>                 |                         |                      |                        |                      |
| Total effect <sup>†</sup>    | 0.0026 (0.0017;0.0036)  |                      | 0.0020 (0.0012;0.0032) |                      |
| Direct effect <sup>†</sup>   | 0.0020 (0.0012;0.0030)  |                      | 0.0012 (0.0006;0.0023) |                      |
| Indirect effect <sup>†</sup> | 0.0005 (0.0003;0.0008)  | 20.5 (11.4;34.4)     | 0.0008 (0.0005;0.0012) | 39.4 (24.4;56.9)     |
| <b>Model 1</b>               |                         |                      |                        |                      |
| Total effect                 | 0.0025 (0.0016;0.0035)  |                      | 0.0018 (0.0011;0.0029) |                      |
| Direct effect                | 0.0017 (0.0009;0.0027)  |                      | 0.0012 (0.0006;0.0021) |                      |
| Indirect effect              | 0.0008 (0.0005;0.0011)  | 30.1 (19.0;46.7)     | 0.0007 (0.0004;0.0010) | 36.0 (21.1;54.2)     |
| <b>Model 2</b>               |                         |                      |                        |                      |
| Total effect                 | 0.0011 (0.0002;0.0021)  |                      | 0.0011 (0.0006;0.0021) |                      |
| Direct effect                | 0.0008 (-0.0001;0.0017) |                      | 0.0008 (0.0003;0.0016) |                      |
| Indirect effect              | 0.0003 (0.0001;0.0005)  | 28.9 (11.5;107.9)    | 0.0003 (0.0002;0.0006) | 30.2 (14.5;58.4)     |
| <b>Model 3</b>               |                         |                      |                        |                      |
| Total effect                 |                         |                      | 0.0011 (0.0006;0.0021) |                      |
| Direct effect                |                         |                      | 0.0007 (0.0002;0.0016) |                      |
| Indirect effect              |                         |                      | 0.0004 (0.0002;0.0007) | 33.8 (17.2;61.8)     |

\* % mediated is calculated as  $\beta^{\text{indirect}} / \beta^{\text{total}} * 100$

<sup>†</sup> Total effect represents association between intrahepatic lipid (IHL) content and haemoglobin A1c (HbA1c); direct effect represents association between IHL and HbA1c not attributable to serum SHBG; indirect effect represents association between IHL and HbA1c attributable to serum SHBG (= mediation).

Model 1: adjusted for age

Model 2: additionally adjusted for BMI, alcohol intake, Dutch Healthy Diet index (DHD-13), level of education, and total physical activity

Model 3: additionally adjusted for menopausal status and use of oestrogen-containing medication

**ESM Table 6.** Mediation effect of serum SHBG on the association between intrahepatic lipids and (log) Matsuda-index

|                              | Men<br>(n = 722)          |                      | Women<br>(n = 662)        |                      |
|------------------------------|---------------------------|----------------------|---------------------------|----------------------|
|                              | Beta (95% CI)             | % mediated (95% CI)* | Beta (95% CI)             | % mediated (95% CI)* |
| <b>Crude</b>                 |                           |                      |                           |                      |
| Total effect <sup>†</sup>    | -0.0222 (-0.0276;-0.0179) |                      | -0.0165 (-0.0243;-0.0119) |                      |
| Direct effect <sup>†</sup>   | -0.0207 (-0.0261;-0.0164) |                      | -0.0136 (-0.0207;-0.0095) |                      |
| Indirect effect <sup>†</sup> | -0.0015 (-0.0026;-0.0005) | 6.7 (2.4;12.0)       | -0.0029 (-0.0053;-0.0009) | 17.8 (5.7;29.4)      |
| <b>Model 1</b>               |                           |                      |                           |                      |
| Total effect                 | -0.0218 (-0.0268;-0.0176) |                      | -0.0164 (-0.0242;-0.0118) |                      |
| Direct effect                | -0.0193 (-0.0243;-0.0152) |                      | -0.0136 (-0.0207;-0.0095) |                      |
| Indirect effect              | -0.0025 (-0.0038;-0.0013) | 11.4 (6.2;17.9)      | -0.0028 (-0.0051;-0.0009) | 17.0 (5.1;28.4)      |
| <b>Model 2</b>               |                           |                      |                           |                      |
| Total effect                 | -0.0134 (-0.0182;-0.0094) |                      | -0.0095 (-0.0150;-0.0062) |                      |
| Direct effect                | -0.0127 (-0.0173;-0.0088) |                      | -0.0087 (-0.0139;-0.0056) |                      |
| Indirect effect              | -0.0007 (-0.0016;-0.0001) | 5.4 (0.7;11.9)       | -0.0007 (-0.0023;0.0006)  | 7.6 (-7.0;21.6)      |
| <b>Model 3</b>               |                           |                      |                           |                      |
| Total effect                 |                           |                      | -0.0097 (-0.0150;-0.0065) |                      |
| Direct effect                |                           |                      | -0.0081 (-0.0127;-0.0051) |                      |
| Indirect effect              |                           |                      | -0.0016 (-0.0036;-0.0004) | 16.3 (4.1;32.4)      |

\* % mediated is calculated as  $\beta^{\text{indirect}} / \beta^{\text{total}} * 100$

<sup>†</sup> Total effect represents association between intrahepatic lipid (IHL) content and Matsuda index; direct effect represents association between IHL and Matsuda index not attributable to serum SHBG; indirect effect represents association between IHL and Matsuda index attributable to serum SHBG (= mediation).

Model 1: adjusted for age

Model 2: additionally adjusted for BMI, alcohol intake, Dutch Healthy Diet index (DHD-13), level of education, and total physical activity

Model 3: additionally adjusted for menopausal status and use of oestrogen-containing medication

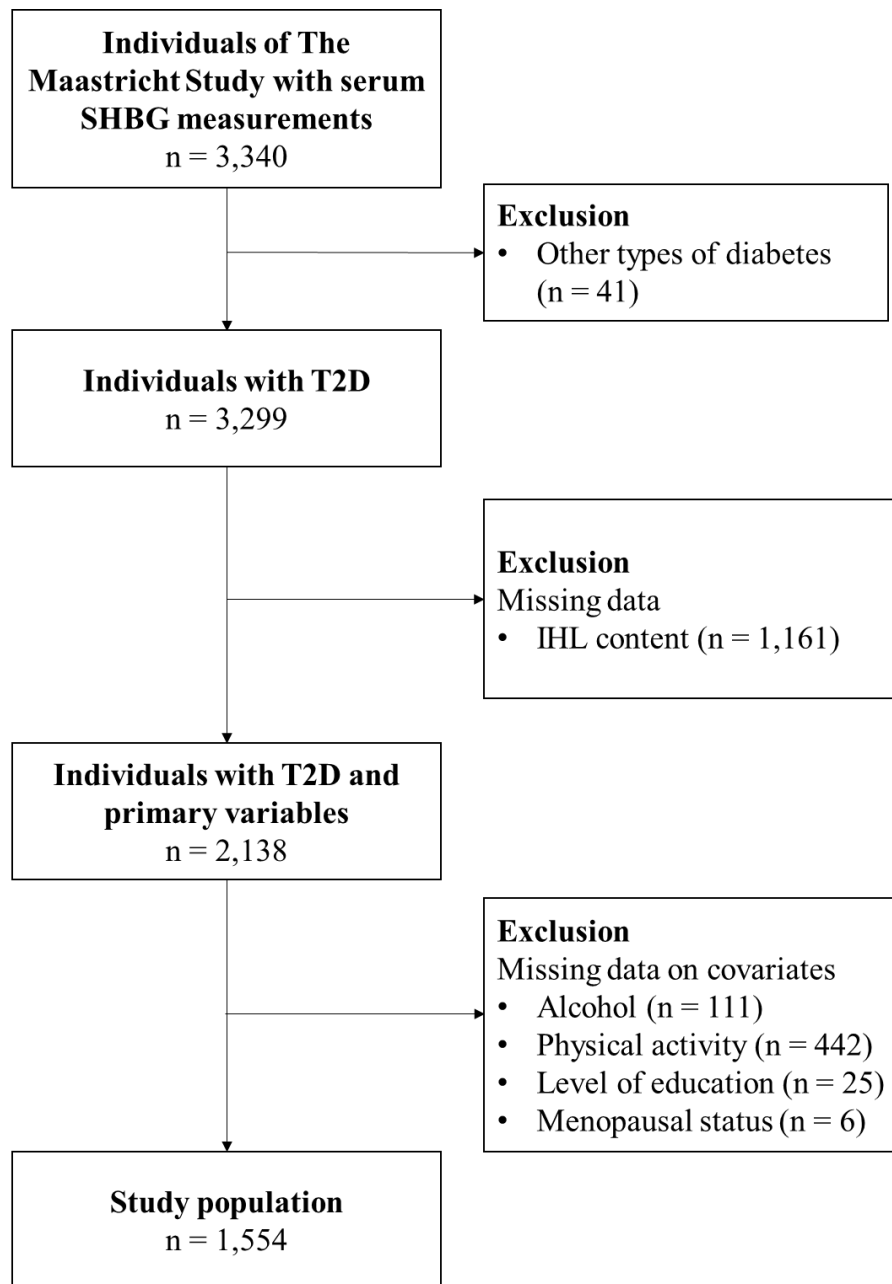

**ESM Figure 1.** Flowchart of study population selection

Abbreviations: IHL: intrahepatic lipid; T2D: type 2 diabetes; SHBG: sex hormone-binding globulin

**A**

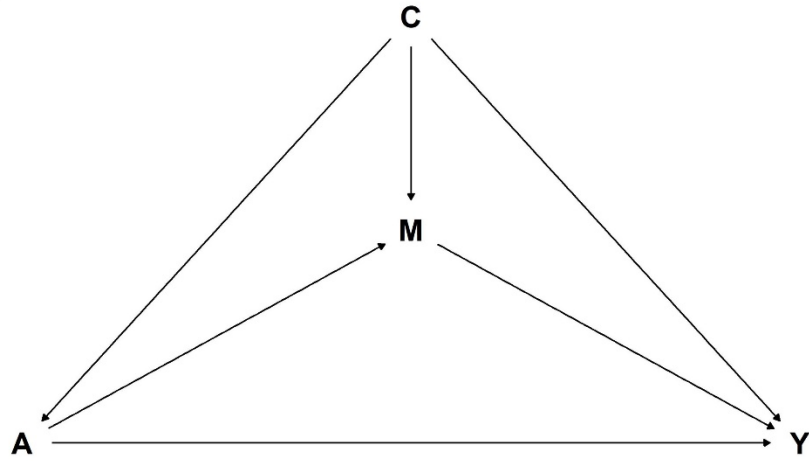

*A (exposure): Intrahepatic lipid content*  
*M (mediator): SHBG*  
*Y (outcome): Type 2 diabetes status*  
*C (confounders not affected by the exposure): Age, BMI, alcohol intake, DHD-13, level of education, total physical activity*

**B**

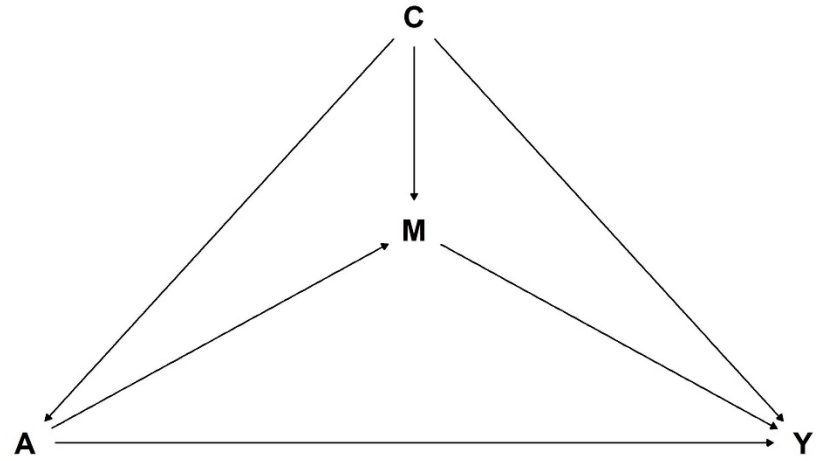

*A (exposure): Intrahepatic lipid content*  
*M (mediator): SHBG*  
*Y (outcome): Type 2 diabetes status*  
*C (confounders not affected by the exposure): Age, BMI, alcohol intake, DHD-13, level of education, total physical activity, menopausal status, use of oestrogen-containing medication*

**ESM Figure 2.** Directed acyclic graph (DAG) illustrating the design of the mediation analyses in men (A) and women (B).
